# Supplementary material
Source: Springer Nature journal article supplement (https://www.springermedizin.de/resource/supplementary/12967_2009_426_MOESM10_ESM.pdf/9576592)
Supplement: MOESM10 [file 9576592]

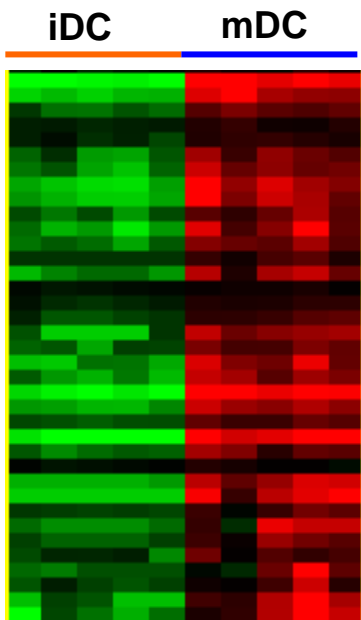

|                |                   |
|----------------|-------------------|
| <b>GROa</b>    | <b>(CXCL1)</b>    |
| <b>MCP1</b>    | <b>(CCL2)</b>     |
| <b>IL6R</b>    |                   |
| <b>TNFR1</b>   | <b>(TNFRSF1A)</b> |
| <b>IL16</b>    |                   |
| <b>TARC</b>    | <b>(CCL17)</b>    |
| <b>MDC</b>     | <b>(CCL22)</b>    |
| <b>MIP1b</b>   | <b>(CCL4)</b>     |
| <b>MIP1a</b>   | <b>(CCL3)</b>     |
| <b>IL2</b>     |                   |
| <b>IL1b</b>    |                   |
| <b>MCP2</b>    | <b>(CCL8)</b>     |
| <b>IL5</b>     |                   |
| <b>IL1a</b>    |                   |
| <b>ICAM1</b>   |                   |
| <b>Eotaxin</b> | <b>(CCL11)</b>    |
| <b>IL15</b>    |                   |
| <b>IL23</b>    |                   |
| <b>TGFa</b>    |                   |
| <b>TNFa</b>    |                   |
| <b>IL1Ra</b>   |                   |
| <b>IL8</b>     |                   |
| <b>MMP10</b>   |                   |
| <b>TNFR2</b>   | <b>(TNFRSF1B)</b> |
| <b>IL6</b>     |                   |
| <b>TIMP1</b>   |                   |
| <b>TIMP2</b>   |                   |
| <b>IL10</b>    |                   |
| <b>IL12p40</b> |                   |
| <b>IL2R</b>    |                   |
| <b>IL12p70</b> |                   |
| <b>IL13</b>    |                   |
| <b>RANTES</b>  | <b>(CCL5)</b>     |
| <b>IFNa</b>    |                   |
| <b>ITAC</b>    | <b>(CXCL11)</b>   |
| <b>IP10</b>    | <b>(CXCL10)</b>   |
| <b>MIG</b>     | <b>(CXCL9)</b>    |
